# Supplementary material for: Comparative Effectiveness of Chuna Manipulative Therapy for Non-Acute Lower Back Pain: A Multi-Center, Pragmatic, Randomized Controlled Trial
Source: MDPI journal article supplement (doi:10.3390/jcm9010144), 2020-01-05
Supplement: s1 [file s1]

**Table S1. Research process of each time point**

| Time point                                                                        | Screening | Active Treatment post-allocation |        |        |        |                     |        | Follow-up       |                  |                  |
|-----------------------------------------------------------------------------------|-----------|----------------------------------|--------|--------|--------|---------------------|--------|-----------------|------------------|------------------|
|                                                                                   |           | Week 1                           | Week 2 | Week 3 | Week 4 | Week 5              | Week 6 | Week 7<br>f/u 1 | Week 12<br>f/u 2 | Week 24<br>f/u 3 |
| Informed consent form                                                             | ○         |                                  |        |        |        |                     |        |                 |                  |                  |
| Vital sign check                                                                  | ○         |                                  |        |        |        |                     |        | ○               | ○                |                  |
| Socio-demographic characteristics, medical history (e.g. LBP, medication history) | ○         |                                  |        |        |        |                     |        |                 |                  |                  |
| Physical examination                                                              | ○         |                                  |        |        |        |                     |        |                 |                  |                  |
| Randomized allocation                                                             |           | ○                                |        |        |        |                     |        |                 |                  |                  |
| Treatment in UC <sup>a</sup> , CMT+UC <sup>a</sup> group (times/week)             |           | ← 2-3 times /week →              |        |        |        | ← 1-3 times /week → |        |                 |                  |                  |
| Symptoms and change in medicine                                                   |           | ○                                | ○      | ○      | ○      | ○                   | ○      | ○               | ○                |                  |
| NRS of LBP and leg pain                                                           | ○         | ○                                | ○      | ○      | ○      | ○                   | ○      | ○               | ○                | ○                |
| ODI                                                                               |           | ○                                |        |        |        | ○                   |        | ○               | ○                |                  |
| PGIC                                                                              |           |                                  |        |        |        | ○                   |        | ○               | ○                |                  |
| ROM                                                                               |           | ○                                |        |        |        | ○                   |        | ○               | ○                |                  |
| EQ-5D                                                                             |           | ○                                |        |        |        | ○                   |        | ○               | ○                | ○                |
| HUI-III                                                                           |           | ○                                |        |        |        | ○                   |        | ○               | ○                | ○                |
| Economic evaluation                                                               |           | ○                                |        |        |        | ○                   |        | ○               | ○                | ○                |
| Adverse events                                                                    |           | ← every visit →                  |        |        |        |                     |        | ○               | ○                | ○                |

a: medication will be administered daily and physical therapy will be applied 2-3 times/week

CMT, Chuna manual therapy; UC, usual care; NRS, numeric rating scale; LBP, lower back pain; ODI, Oswestry disability index; PGIC, patient global impression of change; ROM, range of movement; EQ-5D, EuroQol-5 dimension; HUI-III, health utility index III

**Table S2. Adverse events**

|                                               |
|-----------------------------------------------|
| Cough cold                                    |
| Sore throat                                   |
| Bronchitis                                    |
| Acute laryngopharyngitis                      |
| Bronchiolitis                                 |
| Acute bronchitis                              |
| Sputum                                        |
| Runny nose                                    |
| Right ear pain, oozing                        |
| Chilling                                      |
| Headache                                      |
| Whole body myalgia                            |
| Neck, shoulder pain                           |
| Cervical sprain                               |
| Trapezius Myalgia                             |
| Left knee pain                                |
| Hand-foot numbness                            |
| Ankle sprain                                  |
| Helicobacter pylori gastritis                 |
| Dyspepsia                                     |
| Diarrhea,                                     |
| Psoriasis                                     |
| Itching                                       |
| Laceration of the left 4 <sup>th</sup> finger |
| Laceration of the right toe                   |
| Tinea pedis                                   |
| Menstrual irregularity                        |
| Nasal plastic surgery                         |

Table S3. Semi-standardized treatment plan of study Chuna manipulative therapy techniques based on physician's consensus

| Region                    | Mandatory techniques                                                                                                                                                                                                                                                                                                                                                                                                                                                                                                                                                                                                                                                          | Selective techniques                                                                                                                                                                                                                                                                                                        |
|---------------------------|-------------------------------------------------------------------------------------------------------------------------------------------------------------------------------------------------------------------------------------------------------------------------------------------------------------------------------------------------------------------------------------------------------------------------------------------------------------------------------------------------------------------------------------------------------------------------------------------------------------------------------------------------------------------------------|-----------------------------------------------------------------------------------------------------------------------------------------------------------------------------------------------------------------------------------------------------------------------------------------------------------------------------|
| Lumbar spine <sup>a</sup> | <ul style="list-style-type: none"> <li>• distraction technique</li> </ul> <p>Spine flexion distraction technique (flexion)</p> <ul style="list-style-type: none"> <li>• correction technique</li> </ul> <p>Sidelying lumbar (extension or flexion) dysfunction correction technique</p>                                                                                                                                                                                                                                                                                                                                                                                       | <ul style="list-style-type: none"> <li>• distraction &amp; mobilization technique</li> </ul> <p>- Spinal flexion distraction (circumduction)</p> <p>- Spinal flexion distraction (side-bending)</p> <ul style="list-style-type: none"> <li>• meridian muscle technique</li> </ul> <p>-Iliopsoas myofascial <i>Chuna</i></p> |
| Pelvis <sup>a</sup>       | <p>&lt;Iliac dysfunction (if applicable by evaluation) &gt;</p> <ul style="list-style-type: none"> <li>• correction technique</li> </ul> <p>- Prone iliac anterior rotation dysfunction correction technique/ or</p> <p>- Prone iliac posterior rotation/sacral sidebending dysfunction correction technique</p> <p>- Prone leg raise iliac dysfunction correction technique</p> <p>- Prone inflare-outflare dysfunction correction technique</p> <p>&lt; Sacral dysfunction (if applicable by evaluation) &gt;</p> <ul style="list-style-type: none"> <li>• correction technique</li> </ul> <p>- Prone sacral side-bending and rotation dysfunction correction technique</p> | <ul style="list-style-type: none"> <li>• Prone sacral dysfunction correction technique (extension or flexion)</li> </ul>                                                                                                                                                                                                    |

a Dysfunction type assessed and diagnosed prior to treatment based on the textbook of [Chuna manual medicine 2.5 ed, 20176]

-General process consisted of diagnosis (about 5 min), treatment and recheck (about 10 min).

-Chuna manipulative technique is based on Korean medicine diagnosis & treatment include meridian, meridian muscle, and Do-in exercise.
